# Supplementary material for: Genome-wide association study ofHLA-DQB1*06:02negative essential hypersomnia
Source: PeerJ journal article supplement (doi:10.7717/peerj.66), 2013-04-15

3 (a) Expression level of *SPRED1* gene against rs11854769 SNP marker

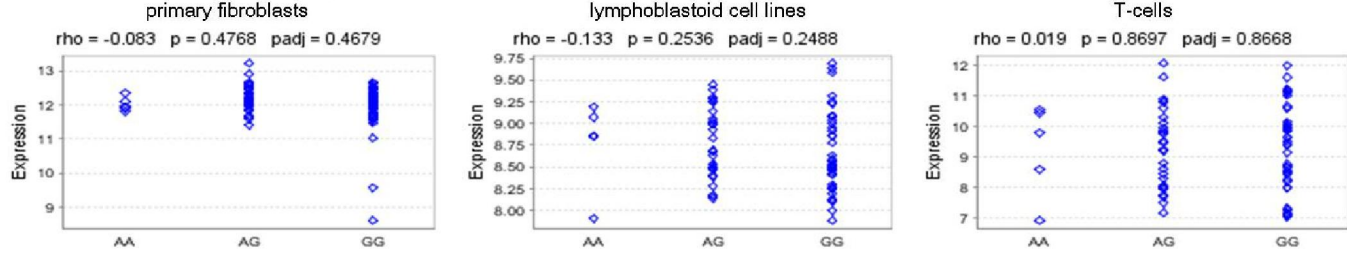

3 (b) Expression level of *CRAT* gene against rs10988217 SNP marker

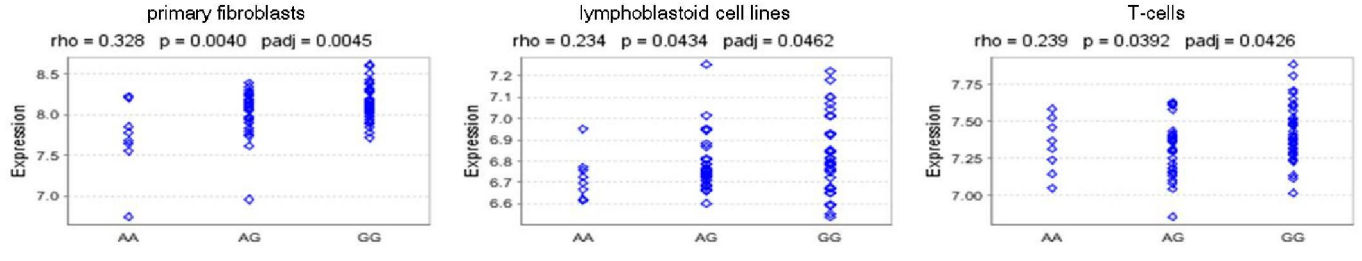

3 (c) Expression level of *PPP2R4* gene against rs10988217 SNP marker

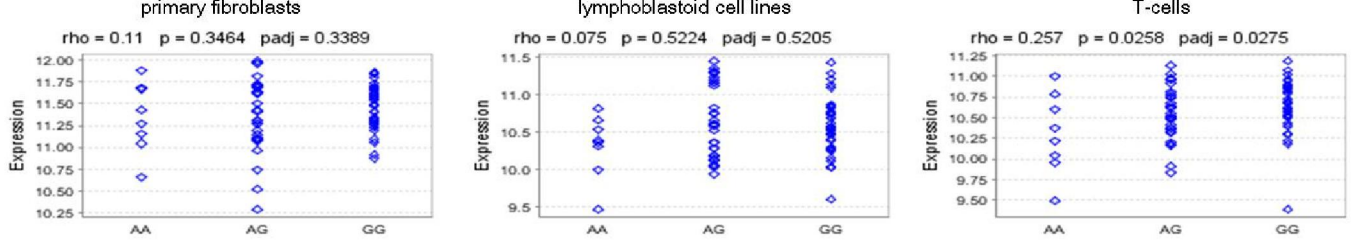

Supplement: Supplementary Figure 3.pdf [file Supplementary%20Figure%203.pdf]
