# Supplementary material for: Genome-wide association study ofHLA-DQB1*06:02negative essential hypersomnia
Source: PeerJ journal article supplement (doi:10.7717/peerj.66), 2013-04-15
Supplement: Supplementary Figure 4.pdf [file Supplementary%20Figure%204.pdf]

4 (a)

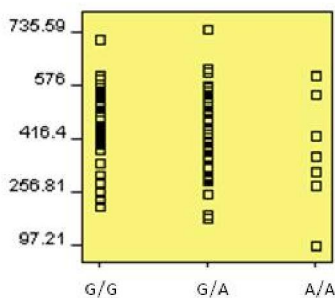

P = 0.369  
 BETA = -17.62  
 Probe Type = transcript  
 Gene = SPRED1  
 Transcript = NM\_152594, 3589141  
 Start = 36331548  
 End = 36468943

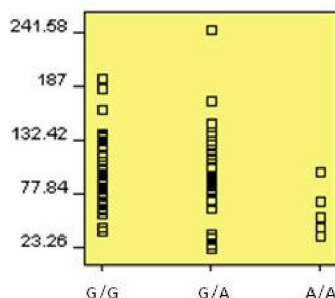

P = 0.4425  
 BETA = -4.171  
 Probe Type = transcript  
 Gene = SPRED1  
 Transcript = NM\_152594, 3589141  
 Start = 36331548  
 End = 36468943

4 (b)

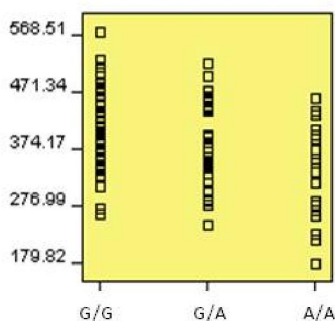

P = 0.002602  
 BETA = -29.71  
 Probe Type = transcript  
 Gene = CRAT  
 Transcript = NM\_000755, 3226844  
 Start = 130896912  
 End = 130913269

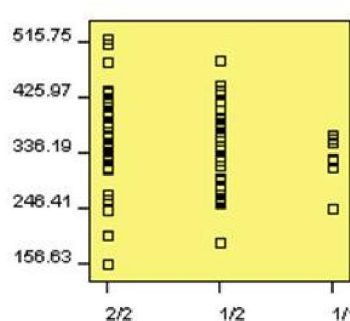

P = 0.02704  
 BETA = -20.14  
 Probe Type = transcript  
 Gene = CRAT  
 Transcript = NM\_000755, 3226844  
 Start = 130896912  
 End = 130913269

4 (c)

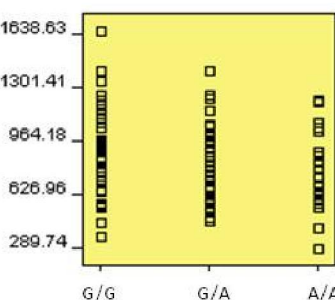

P = 0.04541  
 BETA = -75.54  
 Probe Type = transcript  
 Gene = PPP2R4  
 Transcript = NM\_178001, 3190939  
 Start = 130913065  
 End = 130951026

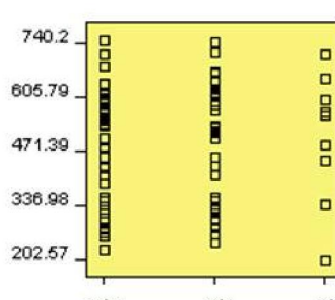

P = 0.8486  
 BETA = -2.674  
 Probe Type = transcript  
 Gene = PPP2R4  
 Transcript = NM\_178001, 3190939  
 Start = 130913065  
 End = 130951026
